# Supplementary material for: The nucleotide pGpp acts as a third alarmone in Bacillus, with functions distinct from those of (p)ppGpp
Source: PubMed Central journal article supplement (PMC7584652; doi:10.1038/s41467-020-19166-1), 2020-10-23
Supplement: 41467_2020_19166_MOESM3_ESM.pdf [file 41467_2020_19166_MOESM3_ESM.pdf]

## Description of Additional Supplementary Files

File Name: Supplementary Data 1

Description: Summary of pGpp, ppGpp and pppGpp binding targets. Fractions of different radiolabel binding under different conditions are listed. Z-score is calculated by the formula that  $Z\text{-score} = (\text{logit}(x) - \text{logit}(\text{median})) / \text{SD}(\text{logit}(x))$ , where  $\text{logit}(x) = \log_{10}(x/1-x)$ , "x" is the fraction of radiolabel binding, "median" is the median of "x" on one plate, " $\text{SD}(\text{logit}(x))$ " is the standard deviation of " $\text{logit}(x)$ " on one plate. Calculation of Z-scores ignores "x" that is below or equals zero.\* The differences in the fraction of pppGpp binding of some proteins in different libraries might be due to the differential expression levels from His-tagged and HisMBP-tagged vectors. Different solubility of His-tagged and HisMBP-tagged proteins (MBP tends to increase the solubility of tagged protein) may also contribute to this difference. NT: not tested; NA: not available due to 0% radiolabel binding.

File Name: Supplementary Data 2

Description: Normalized ion counts of metabolites measured by LC-MS (Raw data of Figure 4a).
